# Supplementary material for: Light-driven rotary polypyrrole/agar composite films
Source: Royal Society of Chemistry journal article supplement (doi:10.1039/d3tc04537d), 2024-01-01
Supplement: d3tc04537d1.pdf [file d3tc04537d1.pdf]

**Electronic Supplementary Material (ESI) for Journal of Materials Chemistry C.**

**This journal is © The Royal Society of Chemistry 2023**

## Electronic Supplementary Information

### **Light-driven rotary polypyrrole/agar composite films**

Dan Wang,<sup>a,b,‡</sup> Zhen Hou,<sup>a,‡</sup> Fengling Wang,<sup>c,d,e</sup> Hui Zhang,<sup>a\*</sup> Jiwei Jiang,<sup>a\*</sup> Bin Dong<sup>a\*</sup>

<sup>a</sup>. Institute of Functional Nano & Soft Materials (FUNSOM), Jiangsu Key Laboratory for Carbon-Based Functional Materials & Devices, State and Local Joint Engineering Laboratory for Novel Functional Polymeric Materials, Soochow University, Suzhou, Jiangsu 215123, China.

<sup>b</sup>. School of Chemistry and Chemical Engineering, Anhui University of Technology, Ma'anshan, Anhui, 243032, China.

<sup>c</sup>. Department of Pharmacy, Hefei Hospital Affiliated to Anhui Medical University (The Second People's Hospital of Hefei), Hefei 230011, Anhui, China.

<sup>d</sup>. School of Pharmacy, Anhui Medical University, Hefei 230032, Anhui, China.

<sup>e</sup>. School of Pharmacy, Anhui University of Chinese Medicine, Hefei 230012, Anhui, China.

<sup>‡</sup>These authors contributed equally to this work.

## **Table of content**

**Section S1.** Supplementary videos

**Section S2.** Supplementary figures

**Section S1.** Supplementary videos

**Video S1.** Light-driven rotary motion of the polypyrrole/agar composite film.

**Video S2.** Deformation process of the polypyrrole/agar composite film upon light actuation.

**Video S3.** Origination of the driving force, i.e., jet-propulsion.

**Video S4.** Light-controlled sliding to the left rear.

**Video S5.** Light-controlled sliding to the right rear.

**Video S6.** Light-driven in-place anti-clockwise rotation.

**Video S7.** Light-driven in-place clockwise rotation.

**Video S8.** Sunlight-driven rotation/sliding of the photoactuator film.

**Video S9.** Drilling holes on ceresin wax by utilizing the light-driven rotation.

Section S2. Supplementary figures

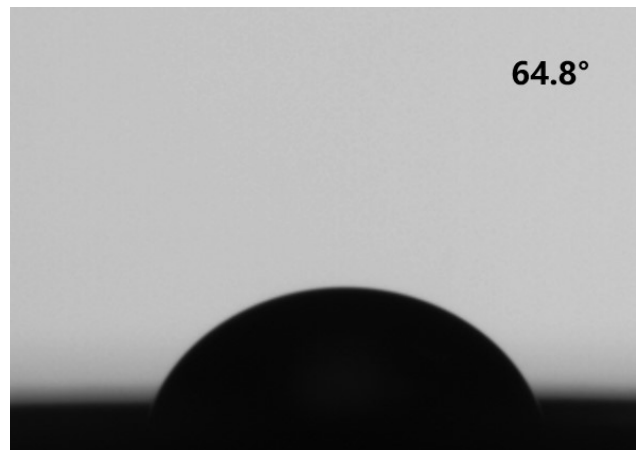

Fig. S1 The water contact angle on the polypyrrole/agar composite film.

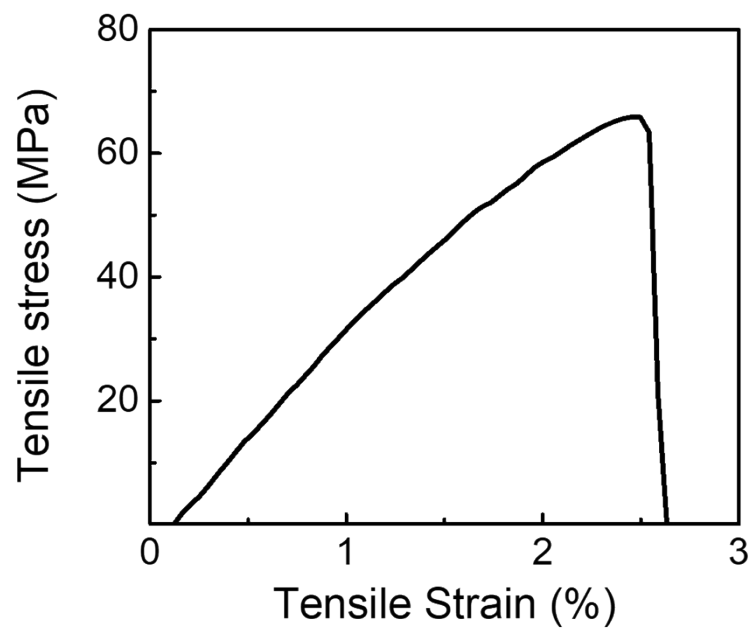

Fig. S2 Tensile stress-strain curve of the polypyrrole/agar photoactuator film.

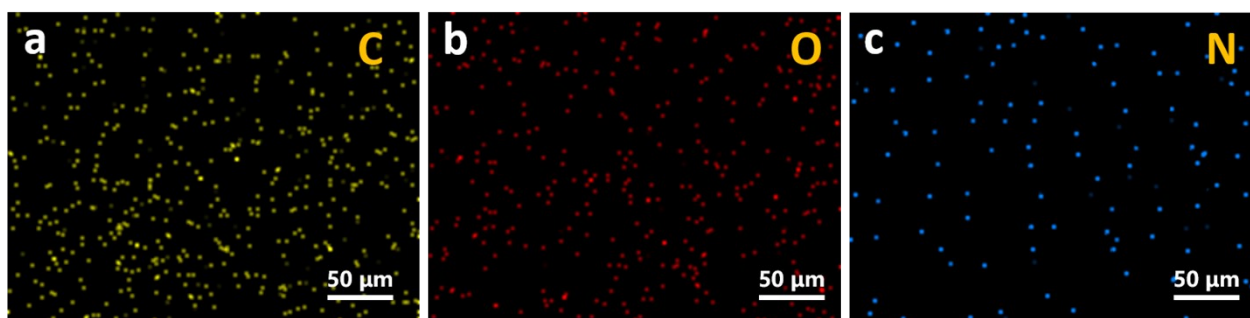

**Fig. S3** Energy-dispersive X-ray (EDX) analysis of the polypyrrole/agar photoactuator film showing the homogeneous distribution of (a) carbon, (b) oxygen and (c) nitrogen elements.

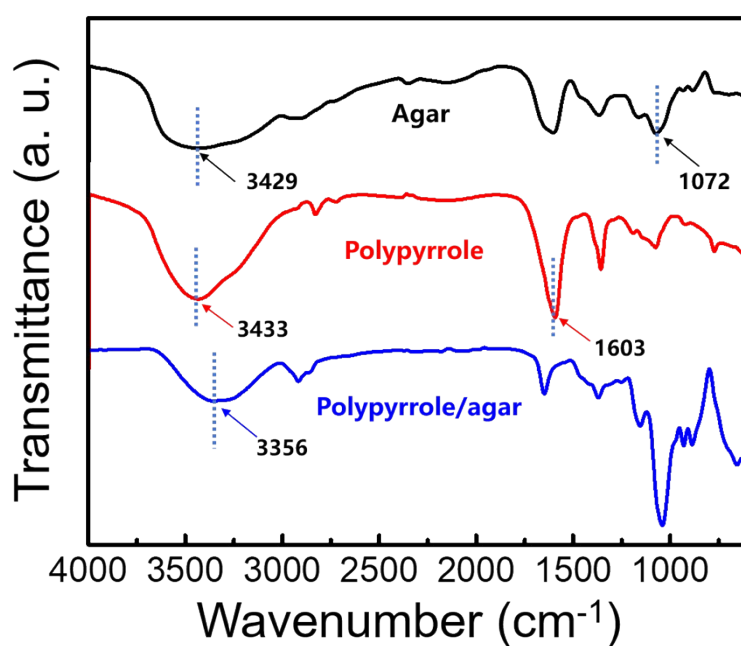

**Fig. S4** Fourier transform infrared spectroscopy (FTIR) spectra of agar (black curve), polypyrrole (red curve), and polypyrrole/agar (blue curve) photoactuator film.

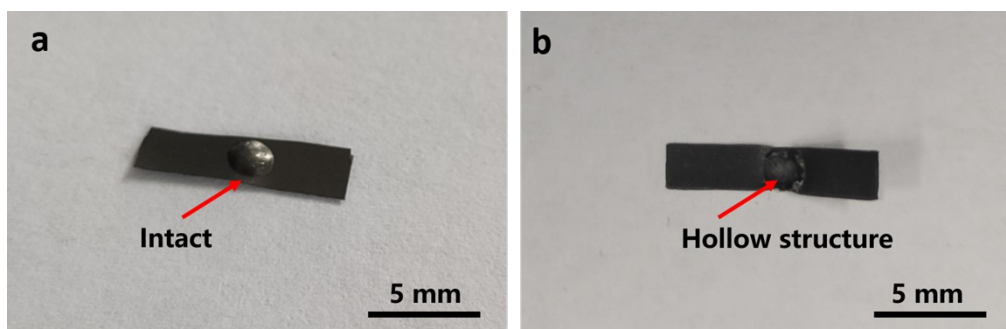

**Figure S5.** CCD images showing the protrusion structure of the polypyrrole/agar photoactuator film.

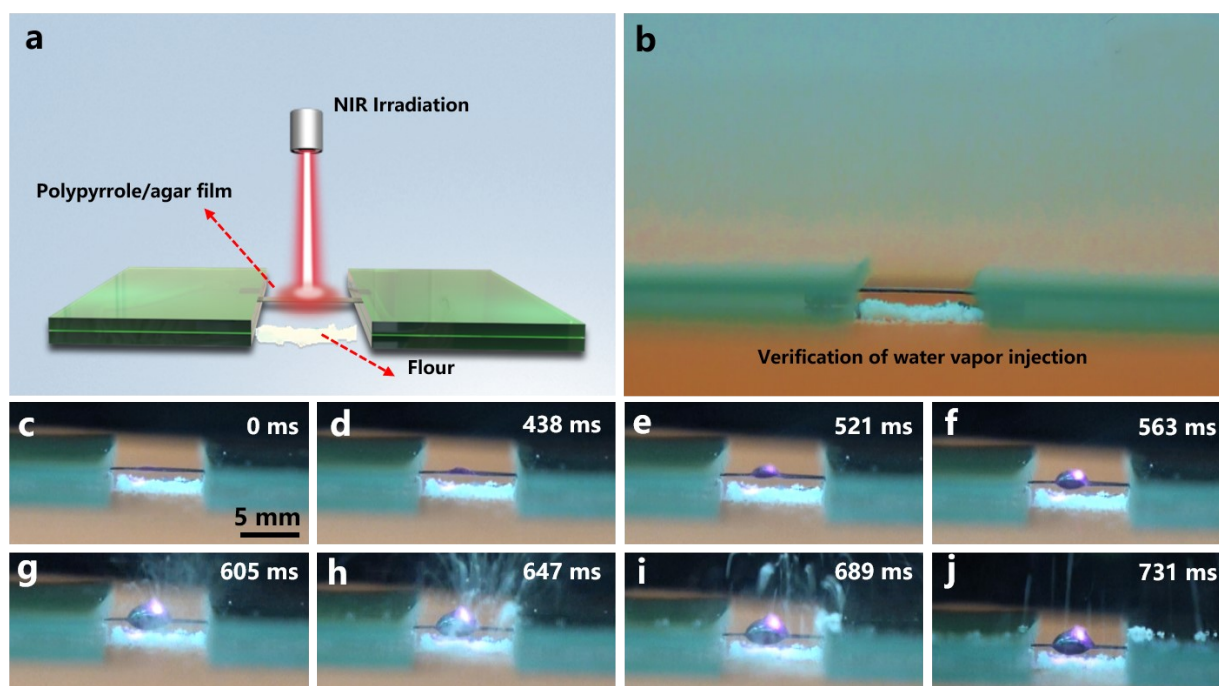

**Fig. S6** (a) Schematic illustration showing experimental setup for the verification of the jet propulsion. Time lapse images obtained from Video S3 showing the polypyrrole/agar photoactuator film (b,c) before and (d-j) after light actuation.

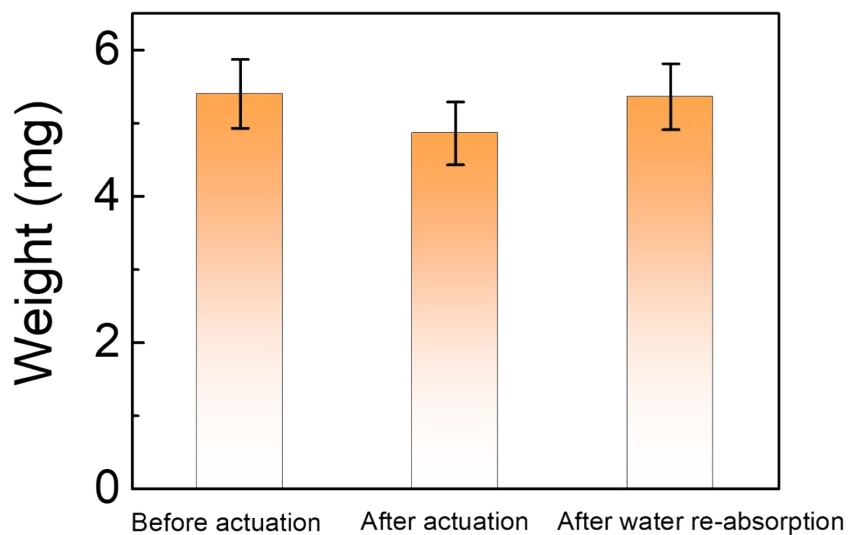

**Fig. S7** The weight variation of the polypyrrole/agar photoactuator film before light actuation, after light actuation and after water re-adsorption.

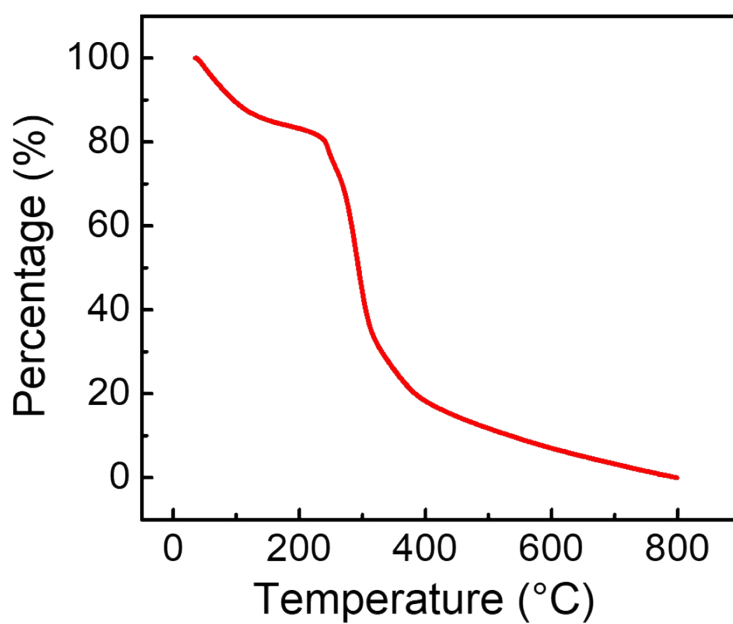

**Fig. S8** The thermogravimetric analysis (TGA) of the polypyrrole/agar photoactuator film.

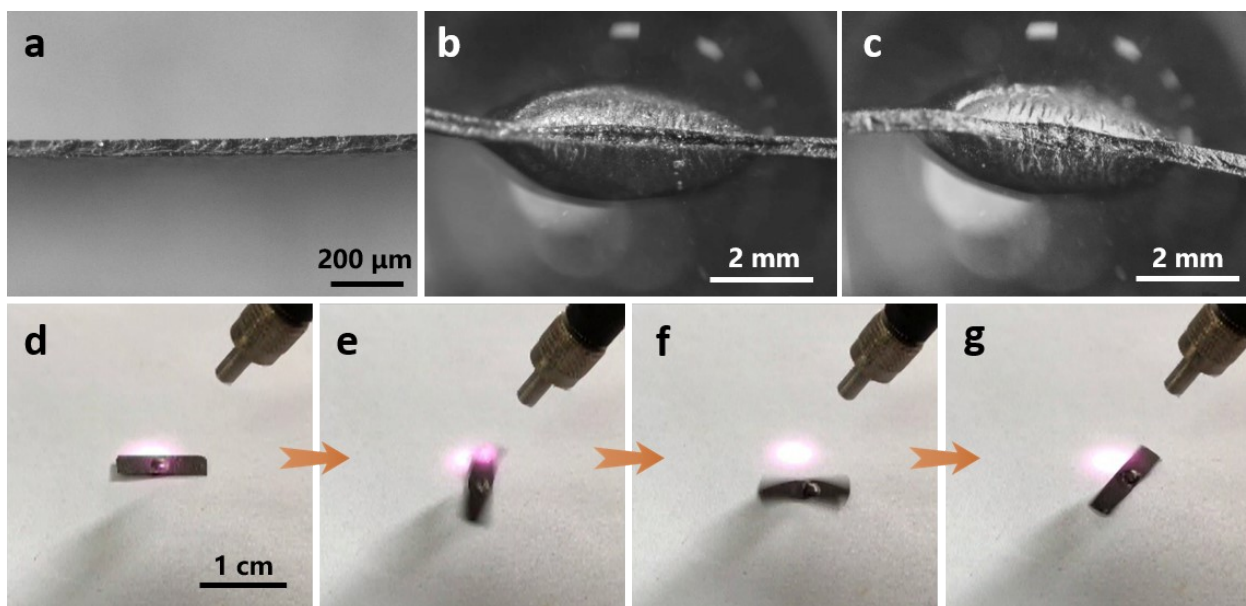

**Fig. S9** CCD images showing the side view of the photoactuator film (a) before, (b) after light irradiation, and (c) after the repair. (d-e) CCD images showing the reusability of the light-driven photoactuator film.

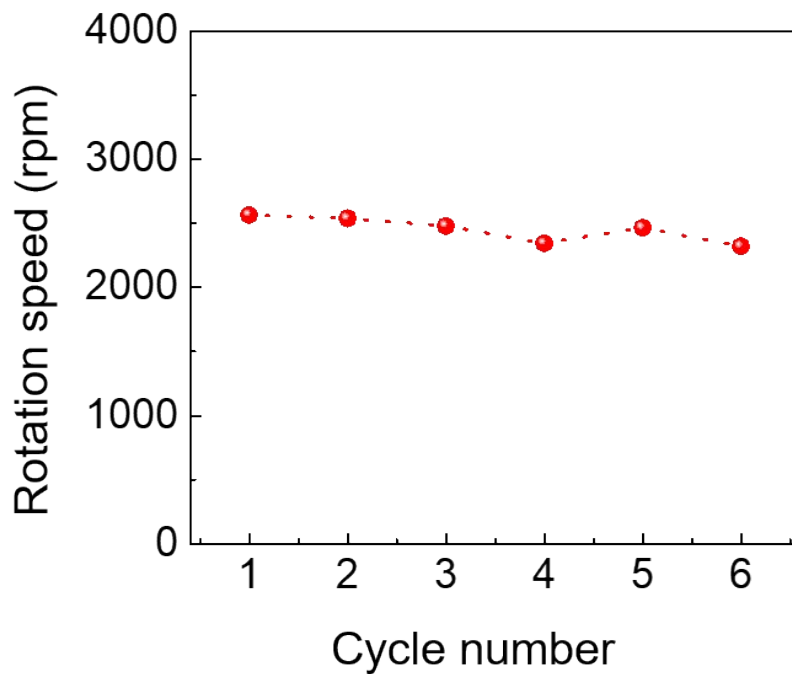

**Fig. S10** The repeatability of the light-driven rotary photoactuator under  $0.4 \text{ W/cm}^2$  repetitive light actuation.



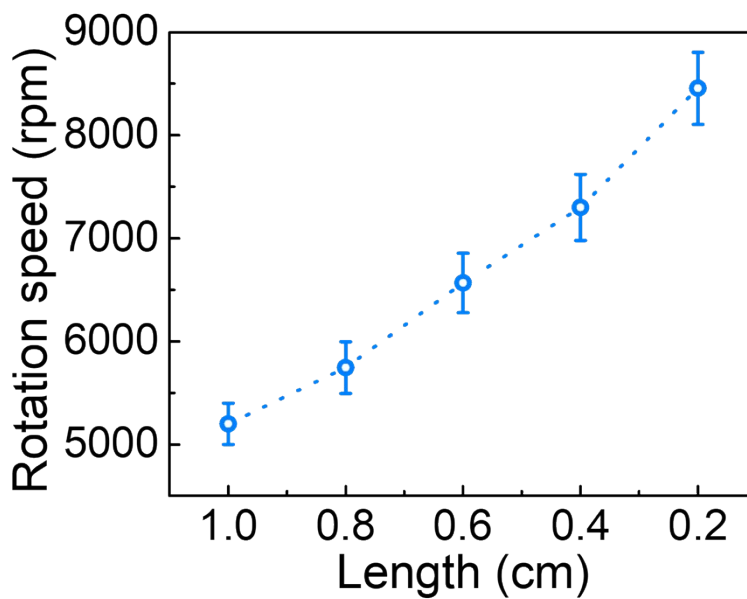

**Fig. S11** The rotation speed of photoactuator film versus length of the film (width=0.2 cm).

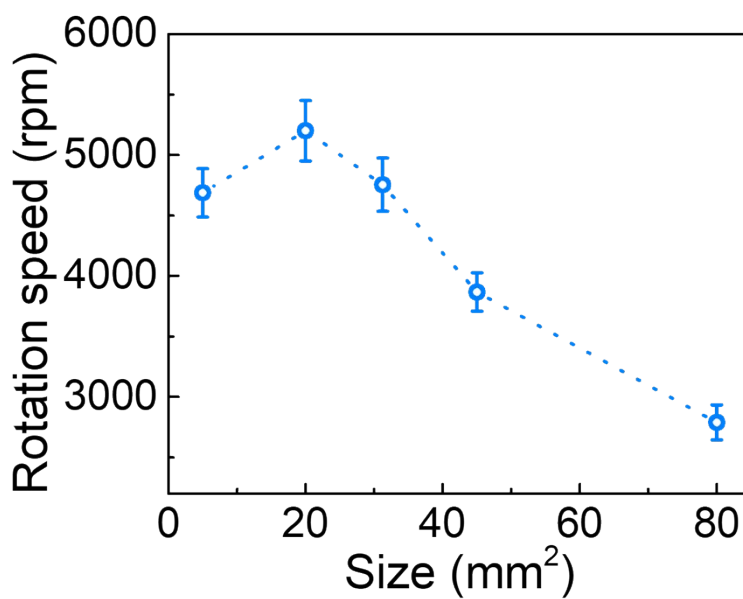

**Fig. S12** The rotation speed of photoactuator film as a function of the length of the film (when the film width is kept at 0.2 cm).

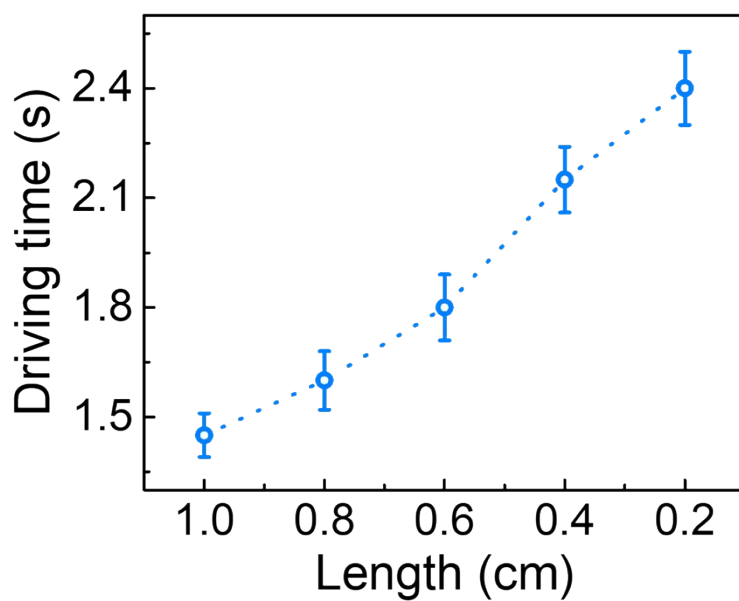

**Fig. S13.** The driving time of the polypyrrole/agar composite film in different length (width=0.2 cm).

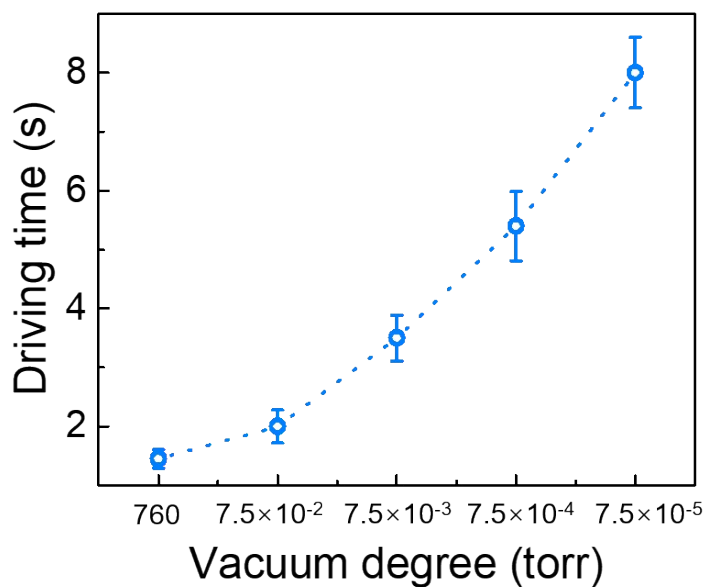

**Fig. S14.** The driving time of the polypyrrole/agar composite film versus vacuum degree (width=0.2 cm).
